# Supplementary material for: Amino Acid Complexes of Zirconium in a Carbon Composite for the Efficient Removal of Fluoride Ions from Water
Source: MDPI journal article supplement (doi:10.3390/ijerph19063640), 2022-03-18
Supplement: s1 [file s1]

## Supplementary Materials

### Amino Acid Complexes of Zirconium in a Carbon Composite for the Efficient Removal of Fluoride Ions from Water

Efrén González-Aguiñaga <sup>1</sup>, José Antonio Pérez-Tavares <sup>1</sup>, Rita Patakfalvi <sup>1,\*</sup>, Tamás Szabó <sup>2,\*</sup>, Erzsébet Illés <sup>3</sup>, Héctor Pérez Ladrón de Guevara <sup>1</sup>, Pablo Eduardo Cardoso-Avila <sup>4</sup>, Jesús Castañeda-Contreras <sup>1</sup> and Quetzalcoatl Enrique Saavedra Arroyo

Centro Universitario de los Lagos, Universidad de Guadalajara, Lagos de Moreno 47460, Jalisco, Mexico; efren.gonzalez5990@alumnos.udg.mx (E.G.-A.); ptavaresjose@gmail.com (J.A.P.-T.); hperez@culagos.udg.mx (H.P.L.d.G.); jesus.castaneda@academicos.udg.mx (J.C.-C.)

<sup>2</sup>Department of Physical Chemistry and Materials Science, University of Szeged, Rerrich Béla tér 1, H-6720 Szeged, Hungary; sztamás@chem.u-szeged.hu (T.S.)

<sup>3</sup>Department of Food Engineering, University of Szeged, 6720 Szeged, Hungary; illese@chem.u-szeged.hu

<sup>4</sup>Centro de Investigaciones en Óptica, A.C, León 37150, Guanajuato, Mexico; pecardoso@cio.mx

<sup>5</sup>Instituto Tecnológico Superior de Irapuato, Irapuato 36821, Guanajuato, Mexico; enrique.sa@irapuato.tecnm.mx

\*Correspondence: rita.patakfalvi@academicos.udg.mx (R.P); sztamás@chem.u-szeged.hu (T.S.)

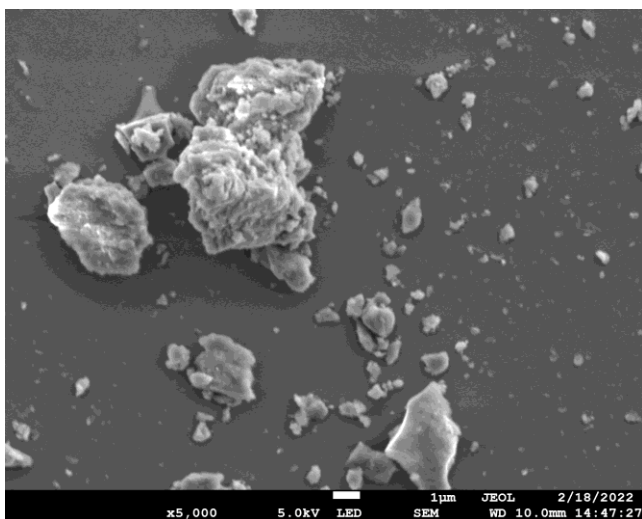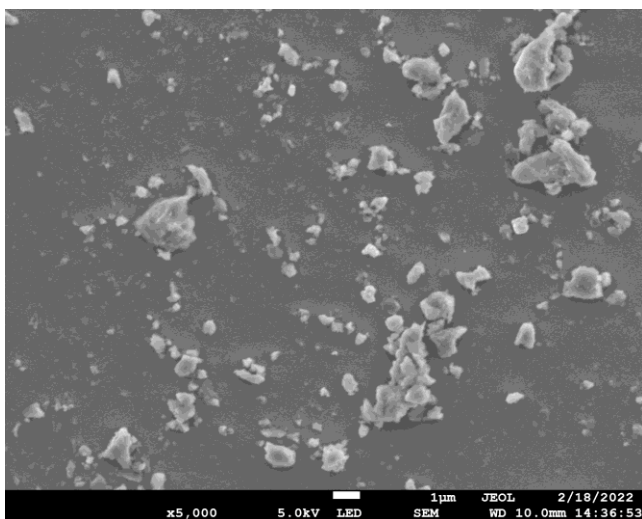

**Figure S1.** SEM images of ZGluGO composite

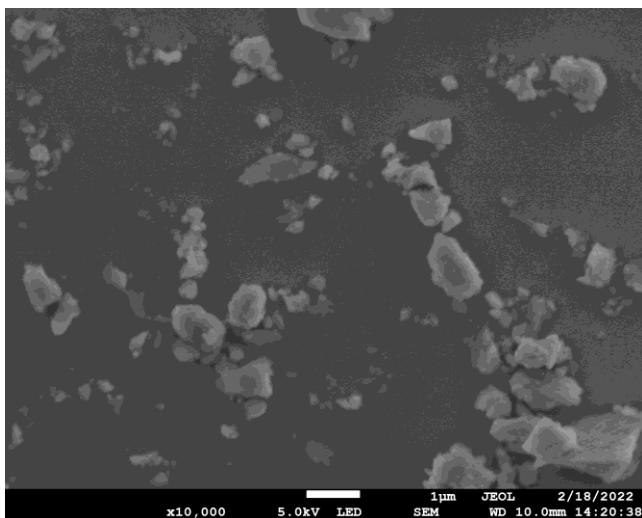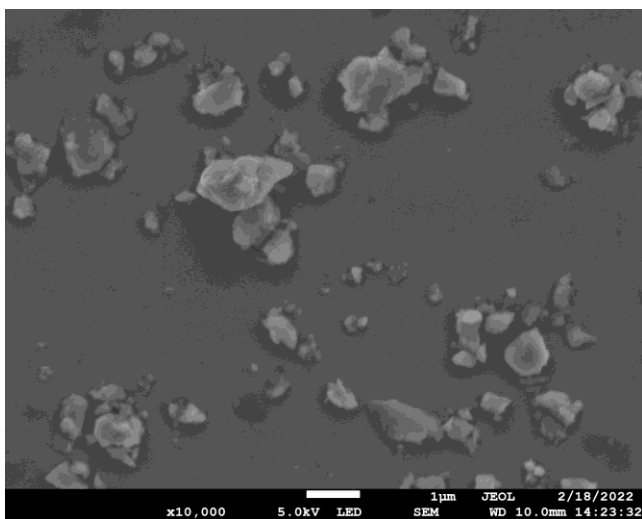

**Figure S2.** SEM images of ZAspGO composite

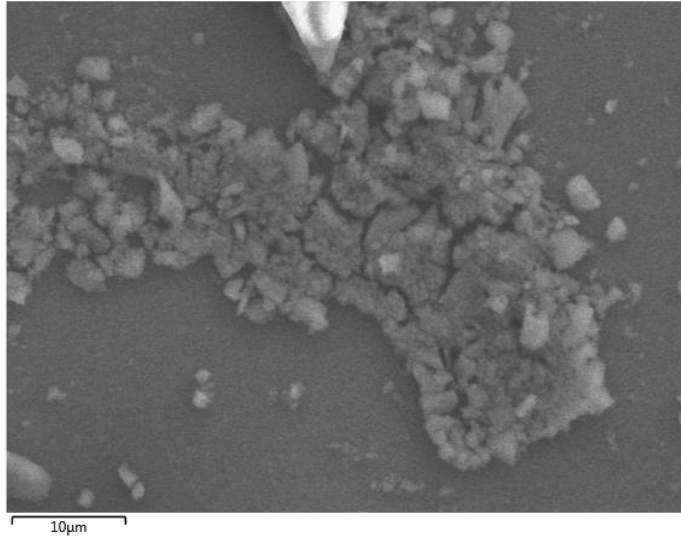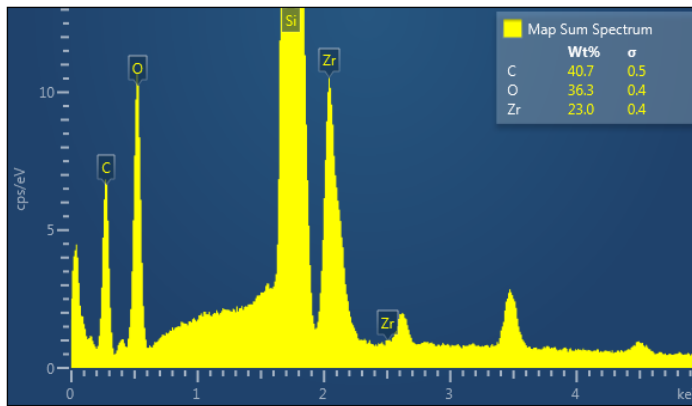

**Figure S3.** SEM image and EDS spectrum of ZGluGO composite

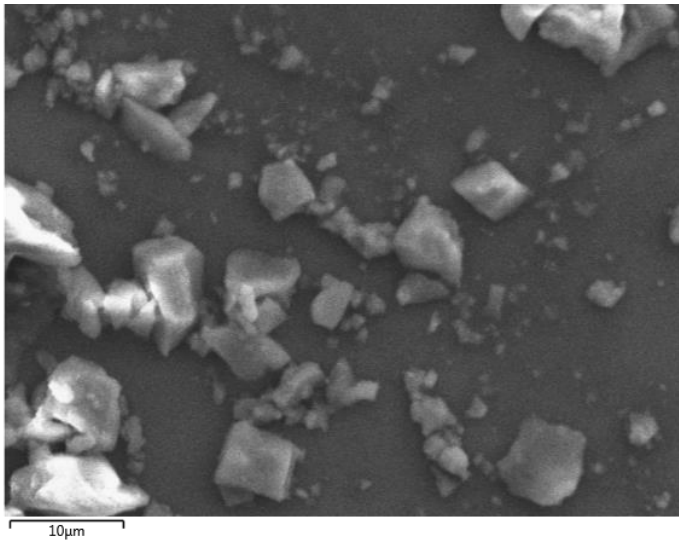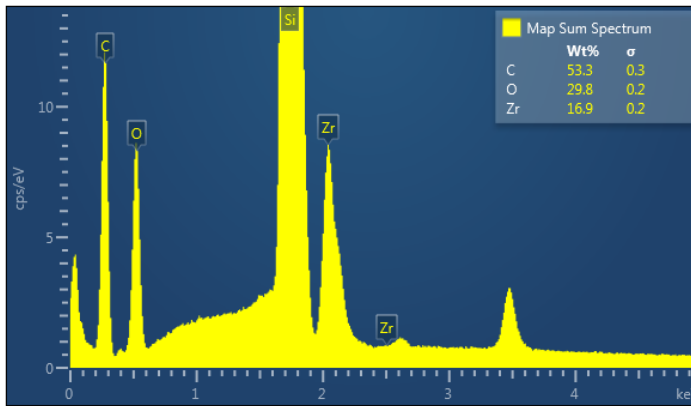

**Figure S4.** SEM image and EDS spectrum of ZAspGO composite

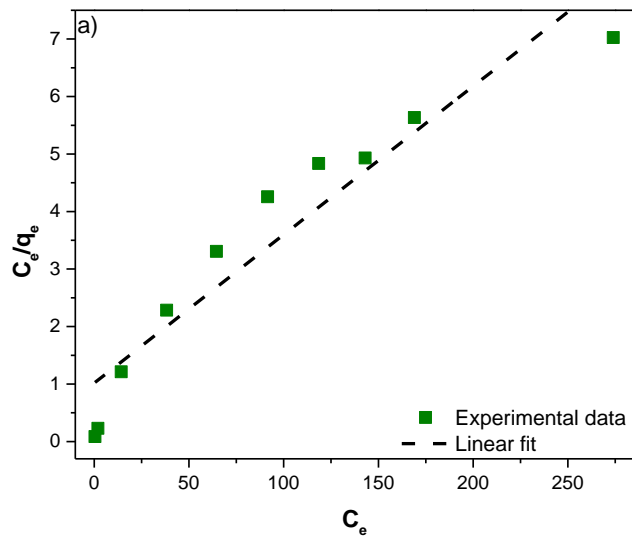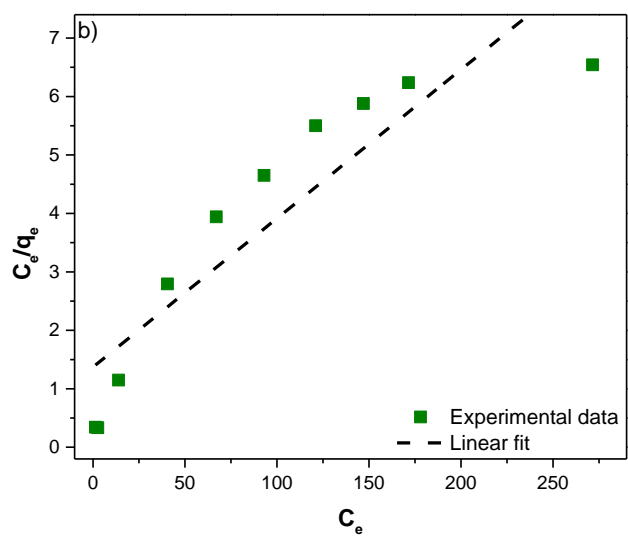

**Figure S5.** Linear fitting model of Langmuir isotherm for fluoride removal (a) ZGluGO and (b) ZAspGO

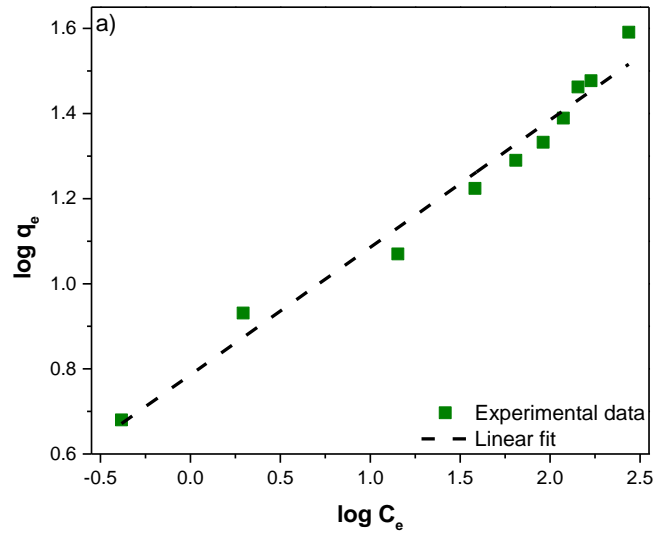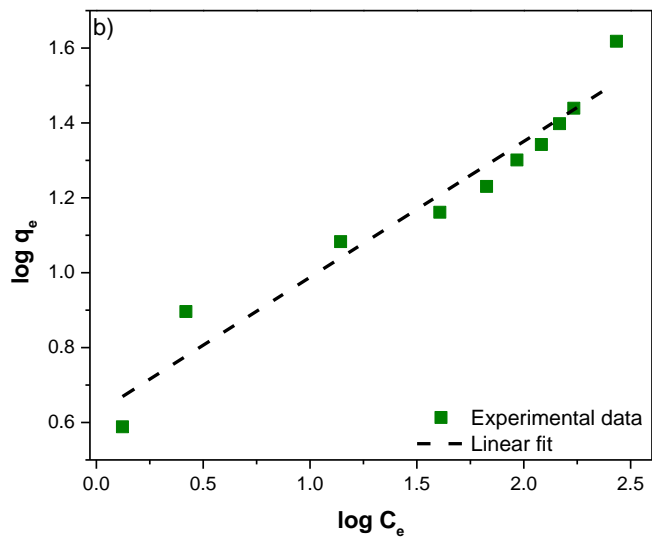

**Figure S6.** Linear fitting model of Freundlich isotherm for fluoride removal (a) ZGluGO and (b) ZAspGO
